# Supplementary material
Source: PubMed Central journal article supplement (PMC3346400)

Fig S1. Coomassie-stained SDS-PAGE of chromatography fractions of purified Cry1Fa protein. NP, non-purified Cry1Fa protein; M, Molecular Weight Marker (in kDa) from highest to lowest: 250, 150, 100, 75, 50, 37, 25.

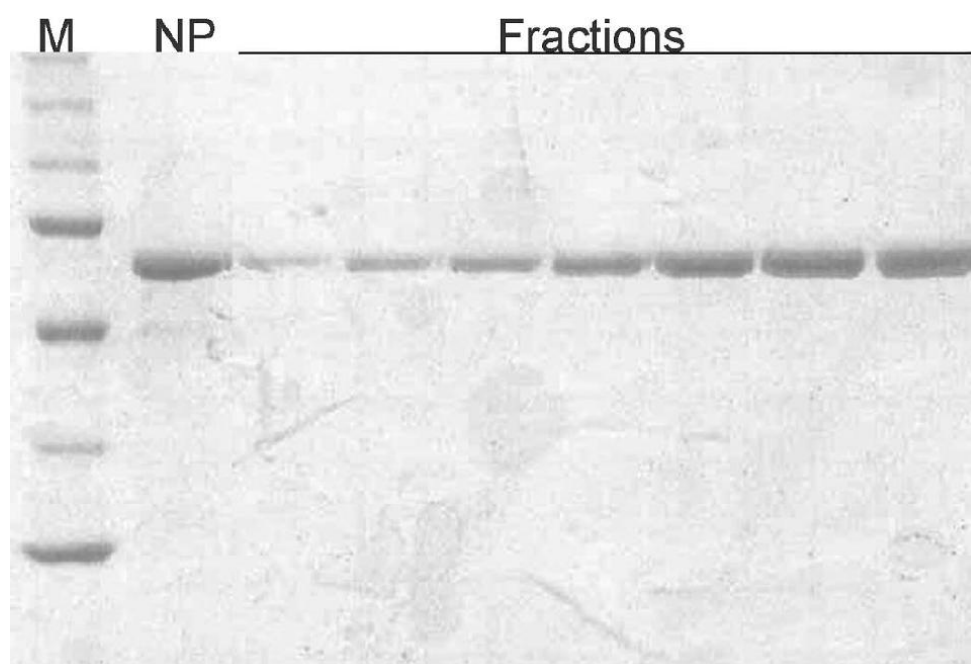

Supplement: supp_78.11.4048_AEM-AEM07591-11-s01.pdf [file supp_78.11.4048_AEM-AEM07591-11-s01.pdf]
